# Supplementary material for: Beneath the surface: Amino acid variation underlying two decades of dengue virus antigenic dynamics in Bangkok, Thailand
Source: PubMed Central journal article supplement (PMC9098070; doi:10.1371/journal.ppat.1010500), 2022-05-02

**DENV1**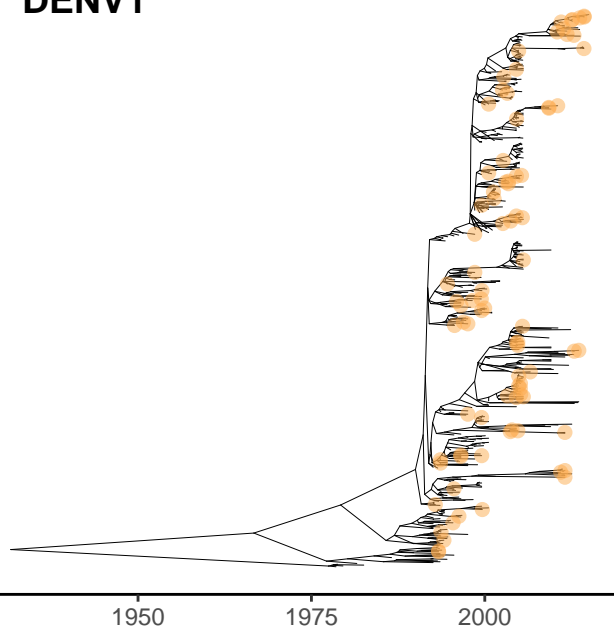**DENV2**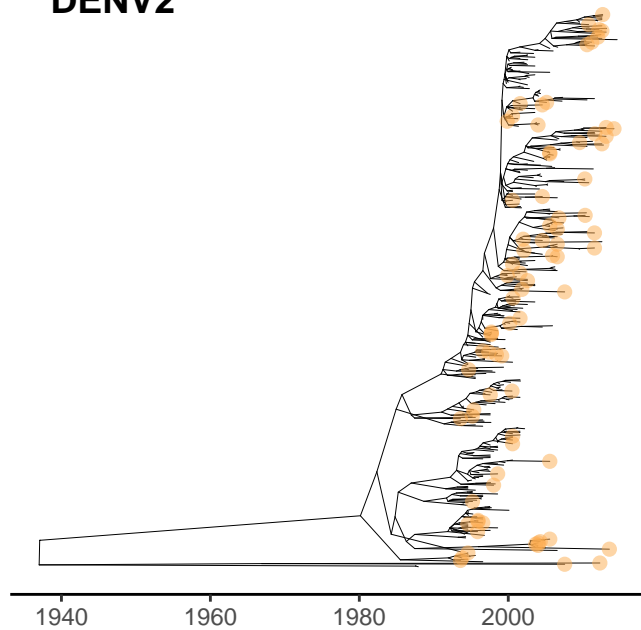**DENV3**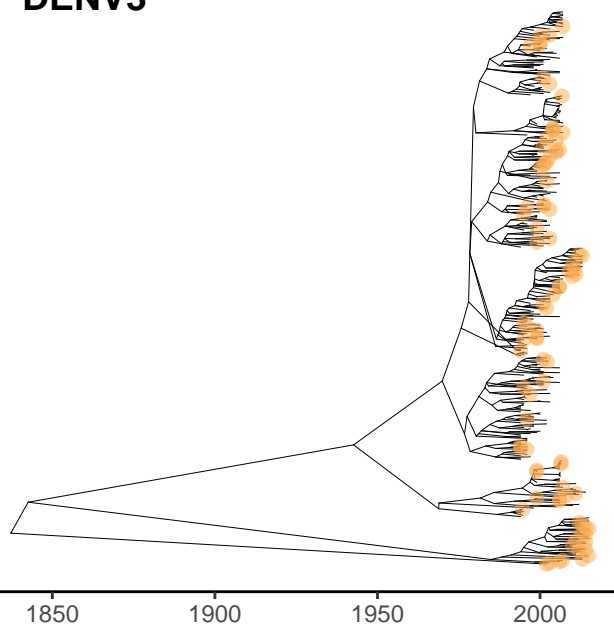**DENV4**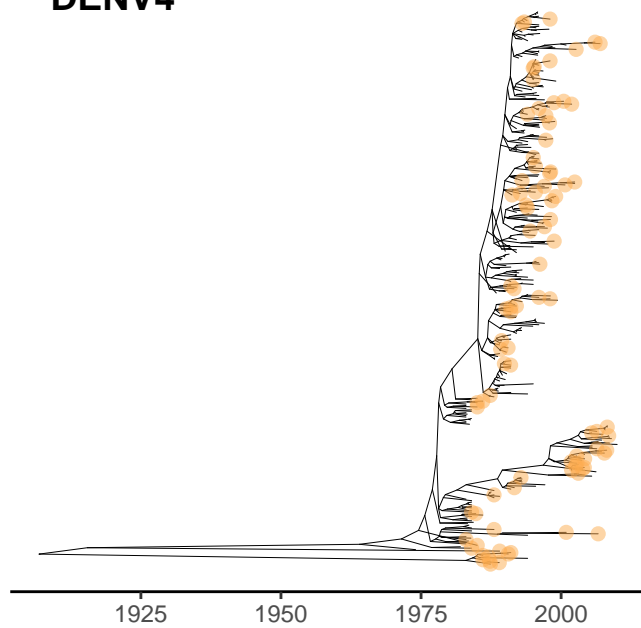

Supplement: ppat.1010500.s001.pdf [file ppat.1010500.s001.pdf]
