# Supplementary material for: Beneath the surface: Amino acid variation underlying two decades of dengue virus antigenic dynamics in Bangkok, Thailand
Source: PubMed Central journal article supplement (PMC9098070; doi:10.1371/journal.ppat.1010500), 2022-05-02
Supplement: ppat.1010500.s004.pdf [file ppat.1010500.s004.pdf]

|                                                            | Epitope association         |                             |                             |       |
|------------------------------------------------------------|-----------------------------|-----------------------------|-----------------------------|-------|
|                                                            | hmAb + mmAb                 | hmAb                        | Not known                   | Total |
| <b>Nonzero effect</b>                                      | <b>22</b><br><b>(28.6%)</b> | <b>21</b><br><b>(27.3%)</b> | <b>55</b><br><b>(71.4%)</b> | 77    |
| <b>Zero effect</b>                                         | 52<br>(23.9%)               | 36<br>(16.5%)               | 166<br>(76.1%)              | 218   |
| <b>No diversity</b>                                        | 37                          | 30                          | 163                         | 200   |
| <b>Total</b>                                               | 111                         | 87                          | 384                         | 495   |
| <b>Odds ratio (hmAb + mmAb) : 1.28 (95%CI: 0.71, 2.29)</b> |                             |                             |                             |       |
| <b>Odds ratio (hmAb only) : 1.90 (95%CI: 1.02, 3.51)</b>   |                             |                             |                             |       |

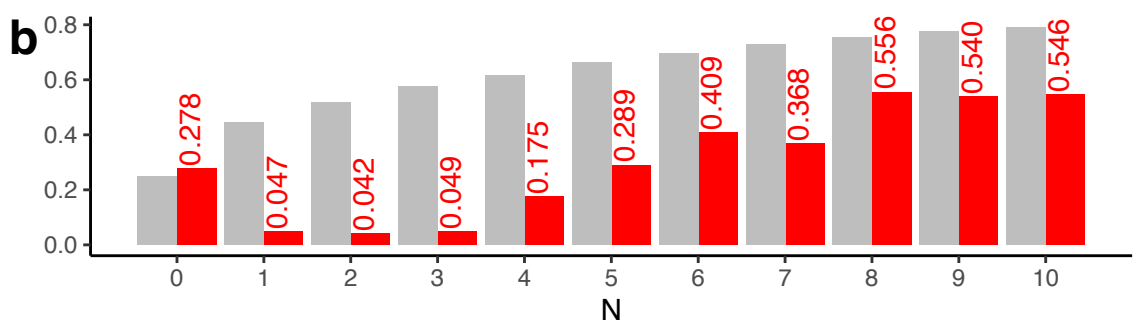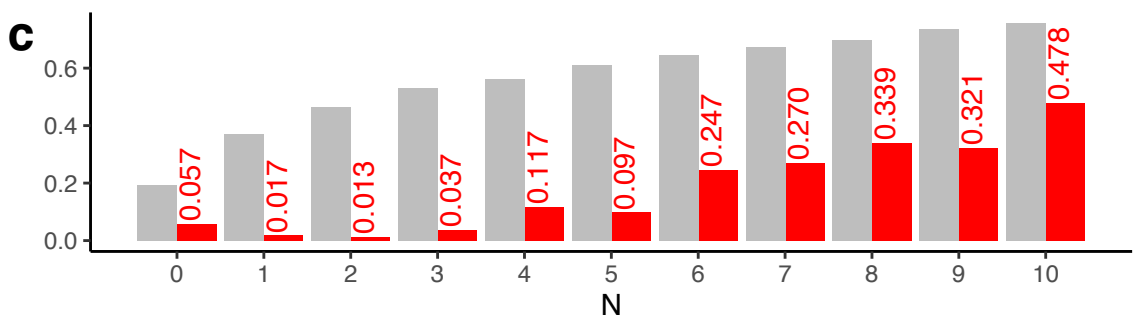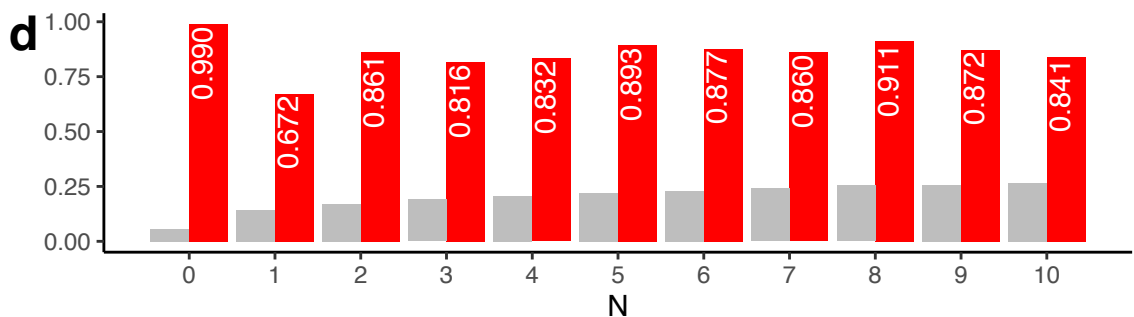

Proportion of variable sites within N sites of known epitopes  
 Probability of the overlap being >= the observed by coincidence

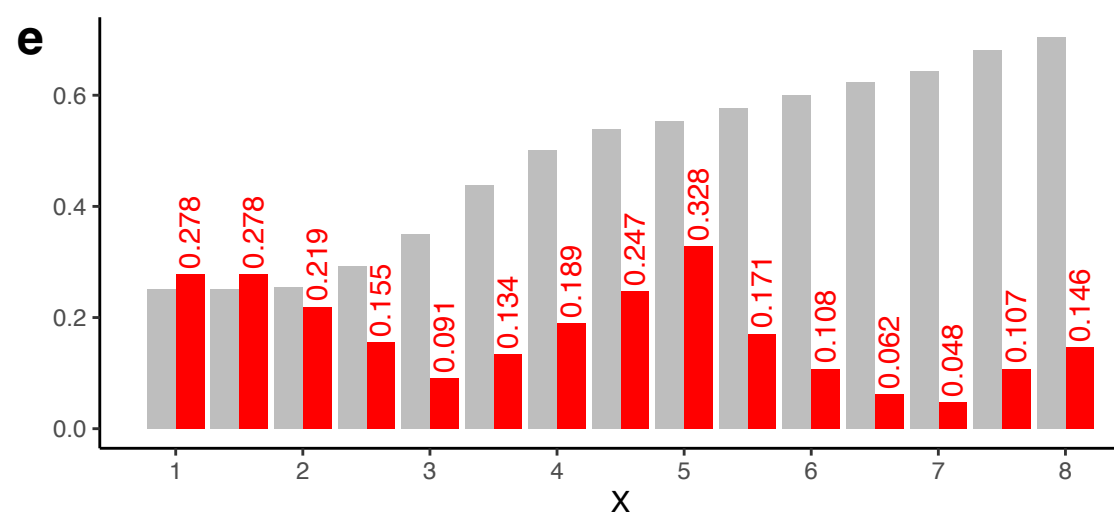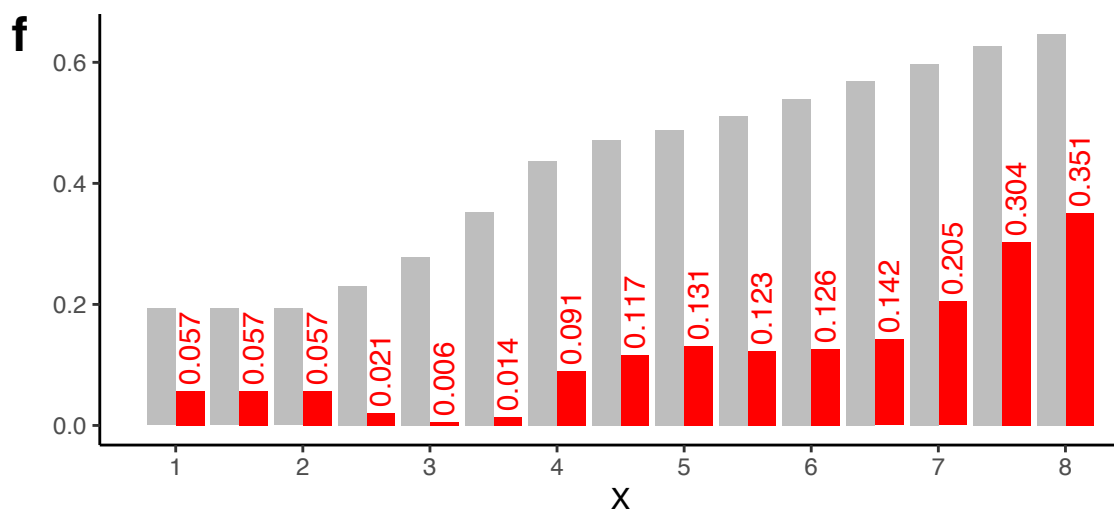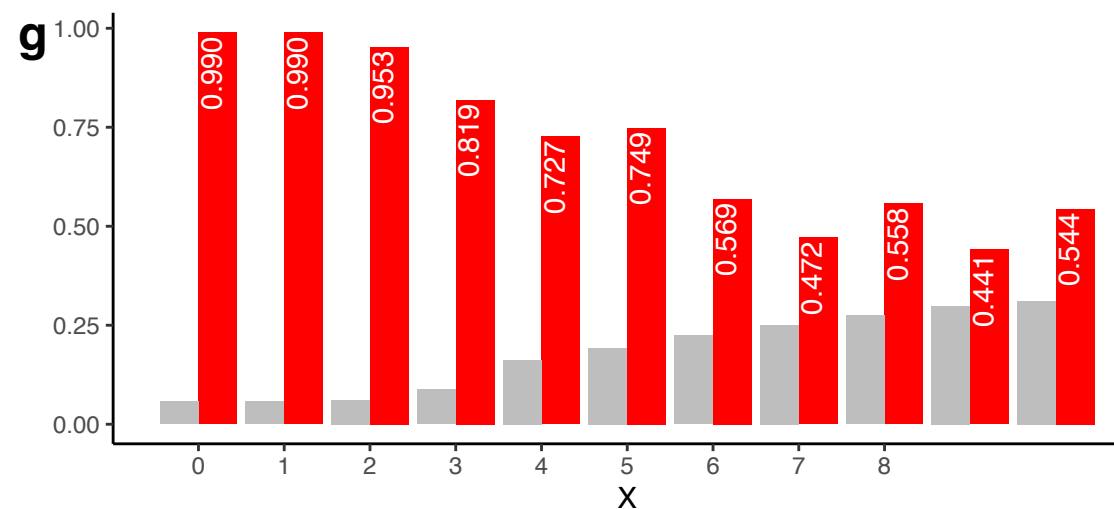

Proportion of variable sites within X angstroms of known epitopes  
 Probability of the overlap being >= the observed by coincidence
