# Supplementary material for: Beneath the surface: Amino acid variation underlying two decades of dengue virus antigenic dynamics in Bangkok, Thailand
Source: PubMed Central journal article supplement (PMC9098070; doi:10.1371/journal.ppat.1010500), 2022-05-02

**a**Proportion of estimations  
showing nonzero effect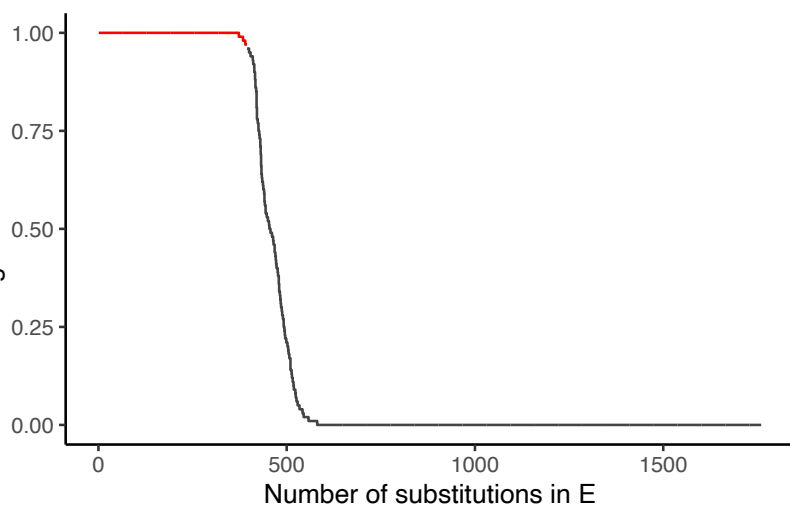**b**Proportion of estimations  
showing nonzero effect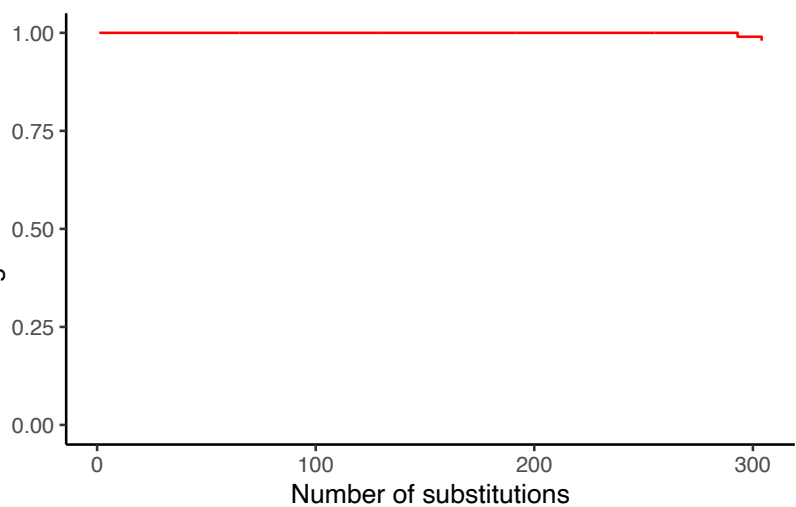

Supplement: ppat.1010500.s005.pdf [file ppat.1010500.s005.pdf]
