# Supplementary material for: Beneath the surface: Amino acid variation underlying two decades of dengue virus antigenic dynamics in Bangkok, Thailand
Source: PubMed Central journal article supplement (PMC9098070; doi:10.1371/journal.ppat.1010500), 2022-05-02

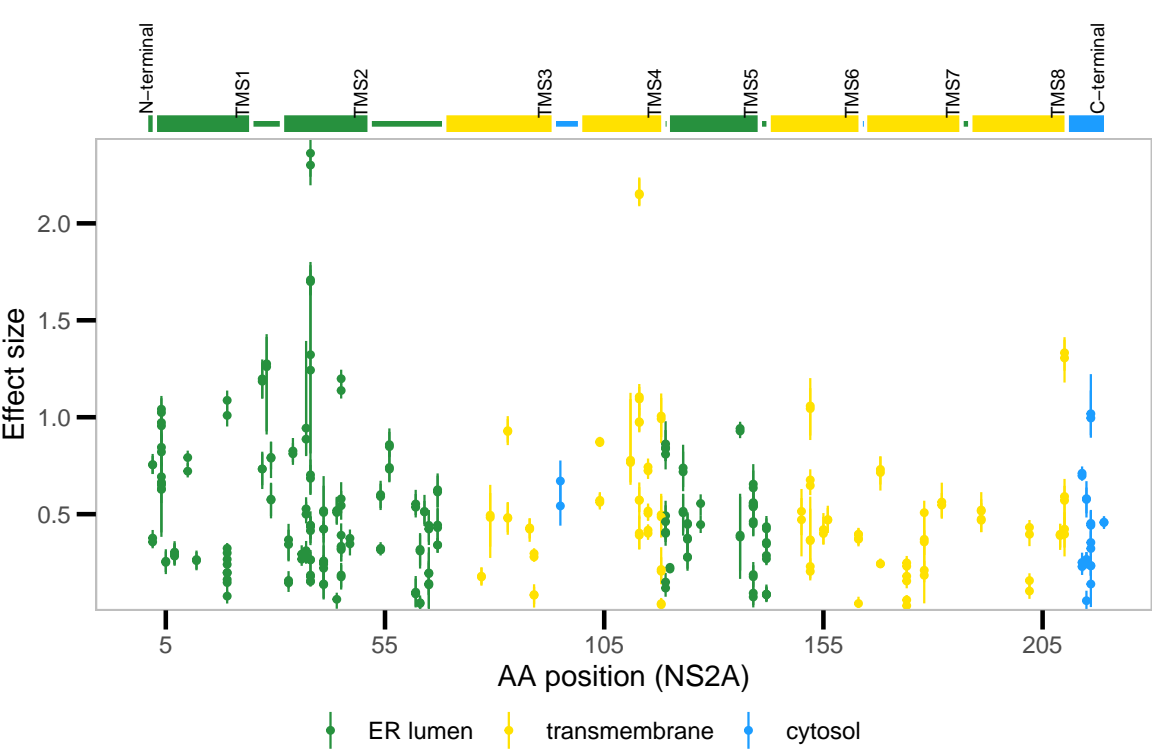

Supplement: ppat.1010500.s006.pdf [file ppat.1010500.s006.pdf]
