# Supplementary material for: Beneath the surface: Amino acid variation underlying two decades of dengue virus antigenic dynamics in Bangkok, Thailand
Source: PubMed Central journal article supplement (PMC9098070; doi:10.1371/journal.ppat.1010500), 2022-05-02

E: M160K

(DENV2,DENV2)

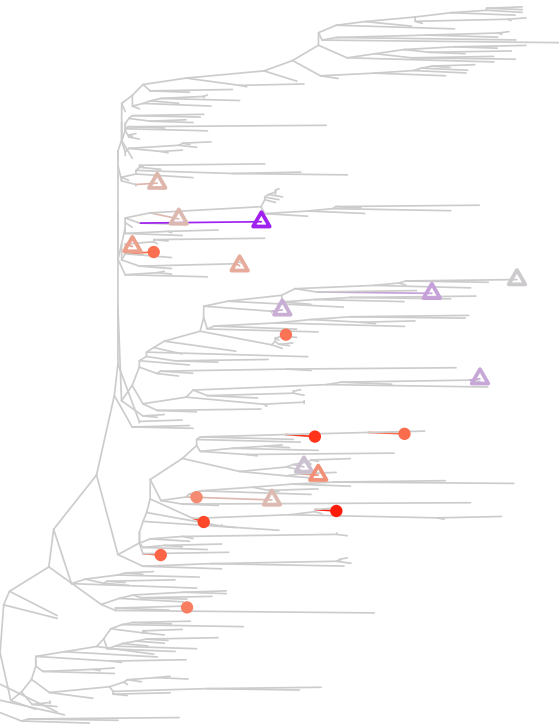

Difference in antigenic distance

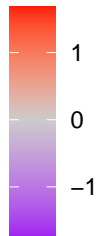

Supplement: ppat.1010500.s013.pdf [file ppat.1010500.s013.pdf]
